# Supplementary material for: Identification and Evaluation of Inhibitors of Lipase from Malassezia restricta using Virtual High-Throughput Screening and Molecular Dynamics Studies
Source: MDPI journal article supplement (doi:10.3390/ijms20040884), 2019-02-18
Supplement: s1 [file s1]

**Table 1.** List of top 80 compounds showing apparent binding affinity.

| S. No. | Compound ID           | Affinity (kcal/mol) | S. No. | Compound ID  | Affinity (kcal/mol) | S. No. | Compound ID  | Affinity (kcal/mol) | S. No. | Compound ID  | Affinity (kcal/mol) |
|--------|-----------------------|---------------------|--------|--------------|---------------------|--------|--------------|---------------------|--------|--------------|---------------------|
| 1.     | RHC80267 <sup>©</sup> | -6.5                | 21.    | ZINC85542736 | -10.7               | 41.    | ZINC85569031 | -10.7               | 61.    | ZINC85593886 | -10.6               |
| 2.     | ZINC85491552          | -11.2               | 22.    | ZINC85542923 | -10.6               | 42.    | ZINC85569037 | -10.6               | 62.    | ZINC85593894 | -10.8               |
| 3.     | ZINC85530320          | -10.6               | 23.    | ZINC85543418 | -11.5               | 43.    | ZINC85569039 | -10.7               | 63.    | ZINC85593896 | -10.7               |
| 4.     | ZINC85530916          | -10.9               | 24.    | ZINC85542923 | -10.6               | 44.    | ZINC85569041 | -10.8               | 64.    | ZINC85593903 | -10.6               |
| 5.     | ZINC85530919          | -10.7               | 25.    | ZINC85543424 | -11.0               | 45.    | ZINC85569045 | -11.1               | 65.    | ZINC85593966 | -10.8               |
| 6.     | ZINC85531067          | -10.7               | 26.    | ZINC85543465 | -10.7               | 46.    | ZINC85569094 | -10.9               | 66.    | ZINC85593968 | -10.8               |
| 7.     | ZINC85531085          | -11.0               | 27.    | ZINC85543470 | -11.9               | 47.    | ZINC85569100 | -10.8               | 67.    | ZINC85626358 | -10.7               |
| 8.     | ZINC85531146          | -11.1               | 28.    | ZINC85543481 | -10.7               | 48.    | ZINC85569130 | -10.7               | 68.    | ZINC85627948 | -10.7               |
| 9.     | ZINC85531154          | -11.2               | 29.    | ZINC85545357 | -11.3               | 49.    | ZINC85569586 | -10.6               | 69.    | ZINC85628568 | -10.7               |
| 10.    | ZINC85531156          | -12.8               | 30.    | ZINC85545830 | -11.1               | 50.    | ZINC85570558 | -10.6               | 70.    | ZINC85628584 | -10.8               |
| 11.    | ZINC85531198          | -11.3               | 31.    | ZINC85545857 | -10.6               | 51.    | ZINC85570604 | -11.1               | 71.    | ZINC85628637 | -10.7               |
| 12.    | ZINC85531244          | -10.8               | 32.    | ZINC85546197 | -11.2               | 52.    | ZINC85570863 | -10.6               | 72.    | ZINC85632546 | -11.0               |
| 13.    | ZINC85531283          | -12.0               | 33.    | ZINC85546208 | -10.9               | 53.    | ZINC85570874 | -10.9               | 73.    | ZINC85632555 | -10.6               |
| 14.    | ZINC85531319          | -11.0               | 34.    | ZINC85546755 | -10.6               | 54.    | ZINC85593108 | -10.7               | 74.    | ZINC95910594 | -12.9               |
| 15.    | ZINC85531411          | -10.8               | 35.    | ZINC85546783 | -10.7               | 55.    | ZINC85593110 | -11.2               | 75.    | ZINC95911591 | -10.8               |
| 16.    | ZINC85531741          | -11.4               | 36.    | ZINC85568691 | -10.7               | 56.    | ZINC85593117 | -10.9               | 76.    | ZINC95911751 | -10.6               |
| 17.    | ZINC85542617          | -11.7               | 37.    | ZINC85569020 | -11.3               | 57.    | ZINC85593824 | -10.6               | 77.    | ZINC95914464 | -11.2               |
| 18.    | ZINC85542621          | -11.7               | 38.    | ZINC85569023 | -11.7               | 58.    | ZINC85593846 | -10.5               | 78.    | ZINC95914660 | -11.7               |
| 19.    | ZINC85542639          | -12.0               | 39.    | ZINC85569026 | -11.6               | 59.    | ZINC85593876 | -10.6               | 79.    | ZINC95914661 | -10.8               |
| 20.    | ZINC85542643          | -10.7               | 40.    | ZINC85569028 | -11.9               | 60.    | ZINC85593878 | -11.2               | 80.    | ZINC95919448 | -11.5               |

<sup>©</sup> symbol denoted as control inhibitor compound.
